# Supplementary material for: Synergistic Combination of AS101 and Azidothymidine against Clinical Isolates of Carbapenem-Resistant Klebsiella pneumoniae
Source: MDPI journal article supplement (doi:10.3390/pathogens10121552), 2021-11-29
Supplement: s1 [file s1]

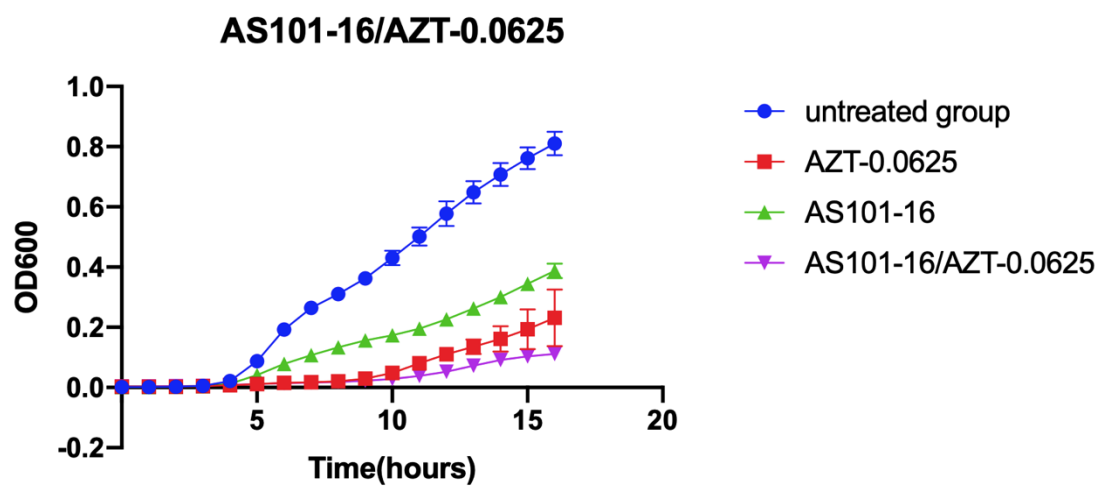

Figure S1: Growth curve of CRE-1044 in synergistic concentration (16 $\mu$ g/mL AS101, 0.0625 $\mu$ g/mL AZT and 16 $\mu$ g/mL AS101- 0.0625 $\mu$ g/mL AZT in combination)
